# Supplementary material
Source: PubMed Central journal article supplement (PMC4787700)
Supplement: fagk791541.ww1_default.pdf [file fagk791541.ww1_default.pdf]

**Appendix 1.** Number and percentage of participants Baseline Fagerström Test for Nicotine Dependence [posted as supplied by author]

| <b>Modified FTND Questions</b>                                               | <b>Modified FTND Scoring*</b> | <b>Varenicline (N=213) n (%)</b> | <b>Placebo (N=218) n (%)</b> |
|------------------------------------------------------------------------------|-------------------------------|----------------------------------|------------------------------|
| <b><i>Question 1: How soon after waking do you take your first ST?</i></b>   |                               |                                  |                              |
| >60 minutes                                                                  | 0                             | 10 (4.7)                         | 14 (6.4)                     |
| 31-60 minutes                                                                | 1                             | 32 (15.0)                        | 31 (14.2)                    |
| 6-30 minutes                                                                 | 2                             | 82 (38.5)                        | 99 (45.4)                    |
| 0-5 minutes                                                                  | 3                             | 89 (41.8)                        | 74 (33.9)                    |
| <b><i>Question 2: How many times a day do you take ST?</i></b>               |                               |                                  |                              |
| 8-12                                                                         | 0                             | 89 (41.8)                        | 87 (39.9)                    |
| >12                                                                          | 1                             | 124 (58.2)                       | 131 (60.1)                   |
| <b><i>Question 3: What type of ST do you use?</i></b>                        |                               |                                  |                              |
| Loose                                                                        | 1                             | 114 (53.5)                       | 126 (57.8)                   |
| Bag                                                                          | 0                             | 105 (49.3)                       | 98 (45.0)                    |
| <b><i>Question 4: Do you keep ST in the mouth most of the time?</i></b>      |                               |                                  |                              |
| Yes                                                                          | 1                             | 1940(91.1)                       | 204 (93.6)                   |
| No                                                                           | 0                             | 19 (8.9)                         | 14 (6.4)                     |
| <b><i>Question 5: Do you intentionally swallow tobacco juices?</i></b>       |                               |                                  |                              |
| Yes                                                                          | 1                             | 144 (67.6)                       | 153 (70.2)                   |
| No                                                                           | 0                             | 69 (32.4)                        | 65 (29.8)                    |
| <b><i>Question 6: How many minutes do you keep each ST in the mouth?</i></b> |                               |                                  |                              |
| 0-20 minutes                                                                 | 0                             | 19 (8.9)                         | 22 (10.1)                    |
| 21-35 minutes                                                                | 1                             | 66 (31.0)                        | 56 (25.7)                    |
| ≥36 minutes                                                                  | 2                             | 128 (60.1)                       | 140 (64.2)                   |
| <b><i>Question 7: Do you use ST if you are ill and in bed?</i></b>           |                               |                                  |                              |
| Yes                                                                          | 1                             | 143 (67.1)                       | 154 (70.6)                   |
| No                                                                           | 0                             | 70 (32.9)                        | 64 (29.4)                    |

\* Modified FTND minimum score = 0; maximum score = 10. The questionnaire has not been standardised and the mean score for a representative population of ST users is not known.

FTND=Fagerström Test for Nicotine Dependence; ST=smokeless tobacco.
