# Supplementary material
Source: PubMed Central journal article supplement (PMC4787700)

**Appendix 2.** Continuous abstinence rates for all participants for Weeks 9-12 and Weeks 9-26 by A) modified Fagerström Test for Nicotine Dependence total score and B) salivary cotinine level (ng/mL) [posted as supplied by author]

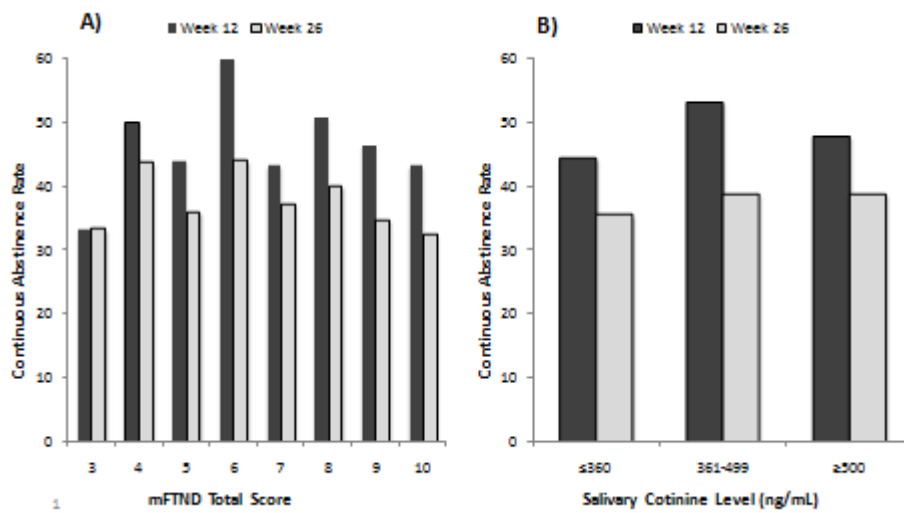

Supplement: fagk791541.ww2_default.pdf [file fagk791541.ww2_default.pdf]
